# Supplementary material for: Carcinoma-associated fibroblast-derived lysyl oxidase-rich extracellular vesicles mediate collagen crosslinking and promote epithelial-mesenchymal transition
Source: Research Square preprint supplement (doi:10.21203/rs.3.rs-1352348/v1), 2022-02-16
Supplement: Supplementary file 1 [file 06136ff5a2237f9c4ed9bc21.docx]

**Carcinoma-associated fibroblast-derived lysyl oxidase-rich extracellular vesicles mediate collagen crosslinking and promote epithelial-mesenchymal transition**

**Supplementary tables**

**Table S1** Clinical and pathological parameters in patients with OSCC

| **Characteristics** | **Cases** | |
| --- | --- | --- |
| **Gender** | | |
| Male | 26 | |
| Female | 14 | |
| **Age** |  |  |
|  | 17 | |
|  | 23 | |
| **Sites** | | |
| Palate | 4 | |
| Buccal mucosa | 8 | |
| tongue | 7 | |
| Lip | 9 | |
| gingiva | 6 | |
| Mouth floor | 1 | |
| Pharynx | 1 | |
| Submandibular | 2 | |
| Mandible | 2 | |
| **Grade** | | |
| I | 24 | |
| II | 11 | |
| III | 5 | |

**Table S2** Clinical and pathological features of OSCC patients

| **Patient** | **Gender** | **Age** | **Tumor type** | **Location** | **Grade** |
| --- | --- | --- | --- | --- | --- |
| 1 | Male | 61 | OSCC | Mouth floor | II |
| 2 | Male | 73 | OSCC | Buccal mucosa | III |
| 3 | Male | 68 | OSCC | Buccal mucosa | I |
| 4 | Male | 43 | OSCC | gingiva | I |
| 5 | Male | 60 | OSCC | Palate | I |
| 6 | Male | 63 | OSCC | Lip | I |
