# Supplementary material for: Carcinoma-associated fibroblast-derived lysyl oxidase-rich extracellular vesicles mediate collagen crosslinking and promote epithelial-mesenchymal transition
Source: Research Square preprint supplement (doi:10.21203/rs.3.rs-1352348/v1), 2022-02-16
Supplement: Supplementary file 3 [file a47e4fb3f464e1c0837e419a.docx]

**Carcinoma-associated fibroblast-derived lysyl oxidase-rich extracellular vesicles mediate collagen crosslinking and promote epithelial-mesenchymal transition**

**Supplementary methods**

**Immunofluorescence staining**

We used the fifth passage of primary cells for initial characterization by immunofluorescent staining. Cells were fixed with 4% paraformaldehyde for 20 min and permeabilized with PBS containing 0.025% Triton X-100. Samples were blocking with normal goat serum contained 5% BSA for 1 h, incubated with primary antibodies at 4℃ overnight. The following primary antibodies were used: pan-cytokeratin (1:100, Merck Millipore, Temecula, CA, USA), vimentin (1:200, Invitrogen, Carlsbad, CA, USA), fibroblast specific protein-1 (FSP-1, 1:100, Abcam, Shanghai, China), fibroblast activation protein (FAP, 1:100, Abcam), α-smooth muscle actin (α-SMA, 1:100, ZSGB-BIO, Beijing, China), and LOX (1: 200, Abcam). Then samples were treated with Dylight 549-Conjugated secondary antibody (1:200; Abbkine, Wuhan, China). Nuclei were counterstained with 4,6-diamidino-2-phenylindole (DAPI, 1:3000, Thermo Fisher Scientific, MA, USA). Images were recorded using an inverted microscope (Olympus IX71, Tokyo, Japan).

**CCK-8 assay**

Cell viability was measured by CCK-8 assay. Cells were seeded in a 96-well plate (1000 cells/well) and cultured overnight followed by treatment with CAF or NF CM for 72 h. CCK-8 reagent (Biosharp, Shanghai, China) mixed with DMEM/F12 was added in each well and incubated for 1 h. Then, the absorbance at 450 nm was measured using a microplate reader (Bio-Rad, Hercules, CA, USA). Each well was repeated at least 3 times, and the mean absorbance was used to assess cell proliferation.

**Wound healing assay**

Cells were seeded into a six-well plate (5×105 cells per well). Next day, a wound was created in each well using a P1000 pipette tip. Then, cells were treated with CAF and NF CM for 72 h. The wound area at the start and end of each experiment was recorded using an inverted microscopy (Olympus IX71). Each well was repeated at least 3 times, and the mean migration rate was used to assess cell migration ability.

## Nanoparticle Tracking analysis (NTA)

Pelleted sEVs were resuspend in PBS. The concentration and size distribution of CAF-S1/S2/S3/S4 sEVs were analyzed using ZetaView (PERTICLE METRIX, German).

**Immunohistochemical staining**

Paraffin-embedded tumor tissues from 40 patients with OSCC undergoing surgical resection were studied. Hematoxylin and Eosin (HE) staining was used to confirm the diagnosis. The clinical and histopathological features of these OSCC cases were shown in Table S1. Fourteen cases of normal oral mucosa tissues were used as controls. Immunohistochemical staining was performed using SPlink Detection Kits (SP-9000, ZSGB-BIO, China). The sections were deparaffinized and rehydrated. Endogenous peroxidase activity was blocked with 3% hydrogen peroxide in methanol. Nonspecific binding sites were blocked with 10% goat serum. Sections were incubated antibodies against FAP (1:200, Abcam) or α-SMA (1:100; Proteintech) overnight at 4°C. Immunoreactions were detected using 3, 3ʹ-diaminobenzidine as the final chromogen. Nuclei were counterstained with hematoxylin. Negative control experiments were carried out by replacing the primary antibody with PBS. The integrated optical density and area of target distribution were measured with Image-Pro® Plus version 6.0. We calculated the mean density of each field, and took the average of the mean density of at least 10 fields as the mean density of each case.
